# Supplementary material for: Plasma-enabled sustainable elemental lifecycles: honeycomb-derived graphenes for next-generation biosensors and supercapacitors
Source: Royal Society of Chemistry journal article supplement (doi:10.1039/c4gc02135e), 2014-12-10
Supplement: c4gc02135e1.pdf [file c4gc02135e1.pdf]

## Supplementary Information

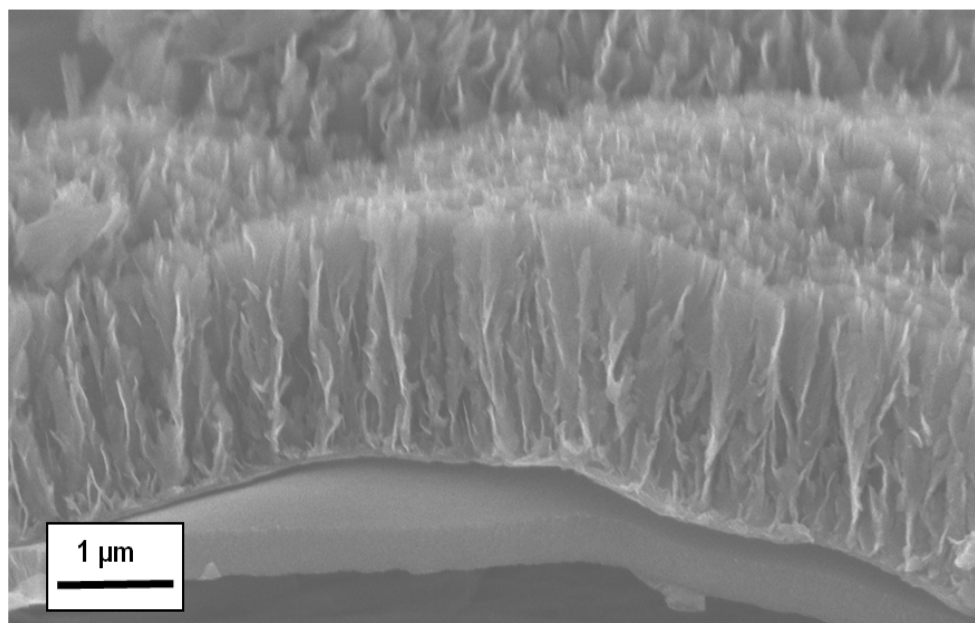

**S1.** Typical cross-sectional SEM image of HC-VGS with a height of  $\sim 2\ \mu\text{m}$ .

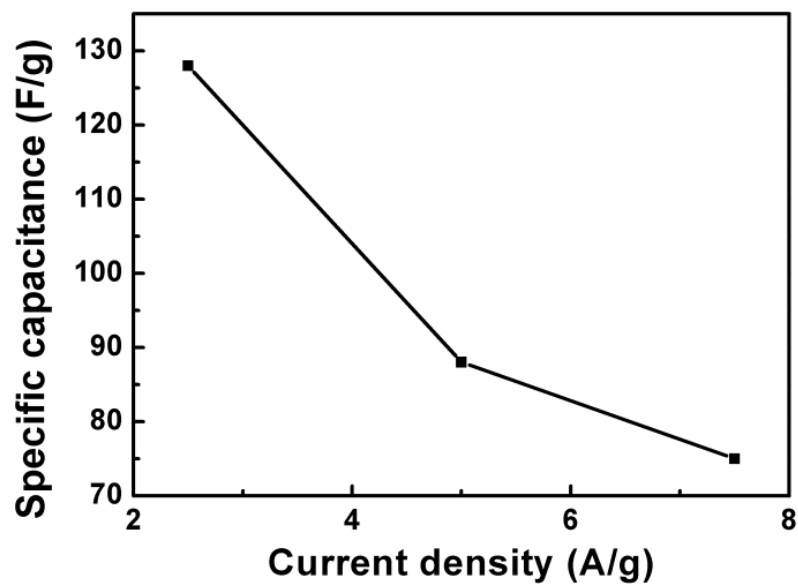

**S2.** Specific capacitance of VGS calculated from the charge/discharge curves.

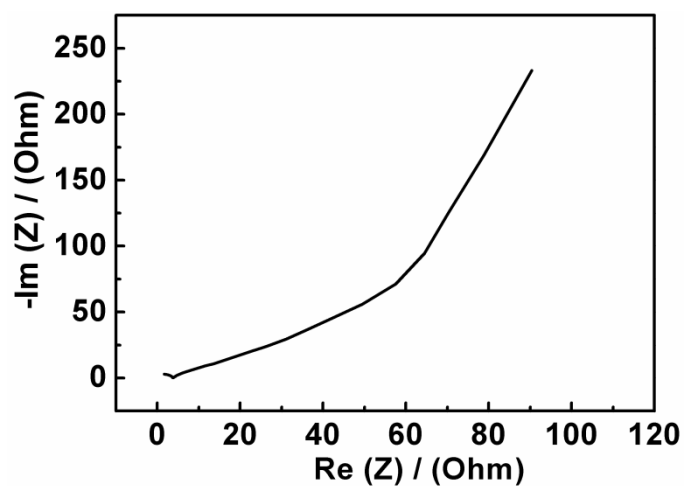

**S3.** EIS measurement for pristine HC-VGS in 1 M Na<sub>2</sub>SO<sub>4</sub> at room temperature using the three-electrode configuration.

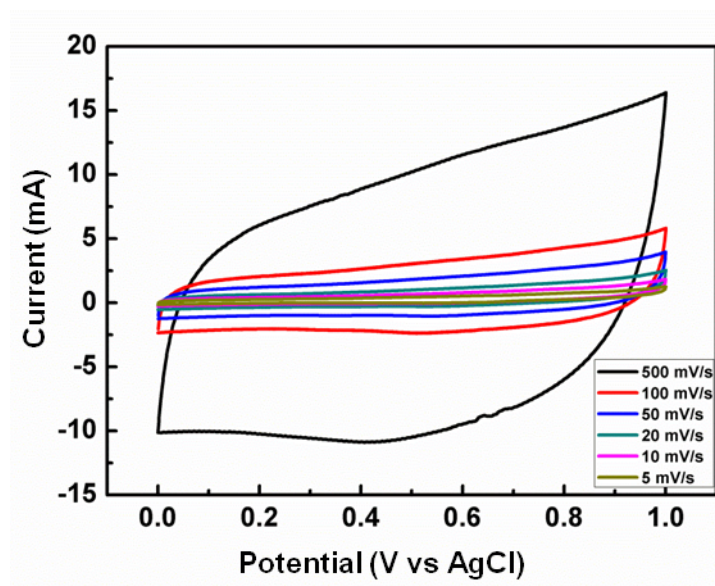

**S4.** Electrochemical performance of HC-VGS in a three-electrode cell configuration. CV curves of HC-VGS at different scan rates of 5, 10, 20, 50, 100 mV/s and 500 mV/s, in 1 M Na<sub>2</sub>SO<sub>4</sub> at room temperature.

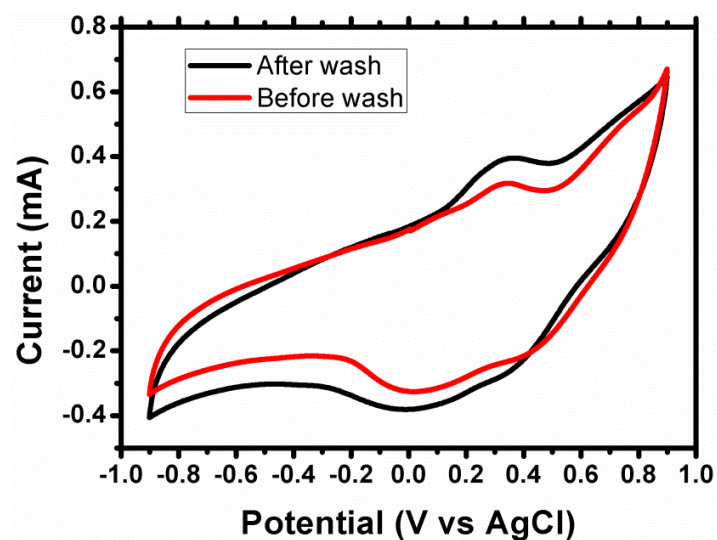

**S5.** CV characterization for the attachment of curcumin onto HC-VGS. Measurements were performed in 20 mM phosphate buffer containing 0.15 M NaCl, at a scan rate of 25 mV/s, and at room temperature. The curcumin-functionalized HC-VGS was washed several times with 10% sodium dodecyl sulphate solution to remove non-specific binding.
